# Supplementary material
Source: PubMed Central journal article supplement (PMC3835145)
Supplement: NIHMS490731-supplement-1.pdf [file NIHMS490731-supplement-1.pdf]

## SUPPLEMENT MATERIAL

### Supplemental Figure I

A

No-injury

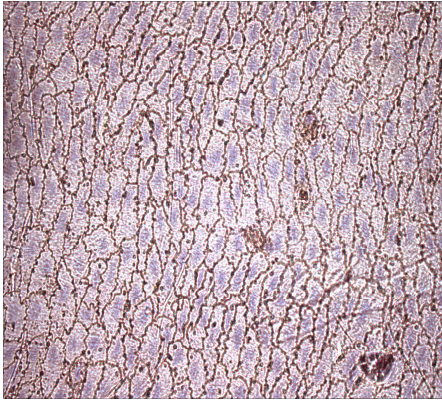

Injury

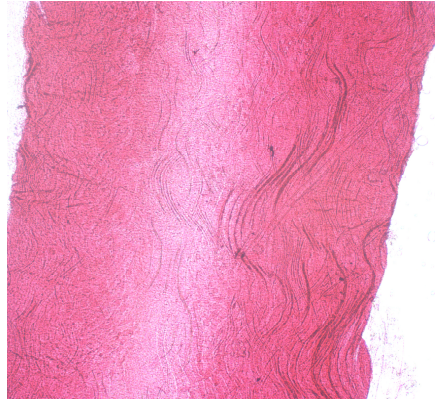

Silver Nitrate

B

No-injury

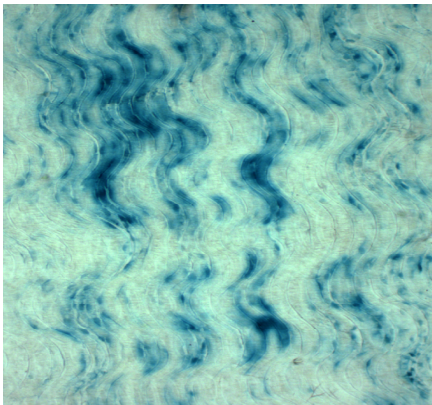

Injury

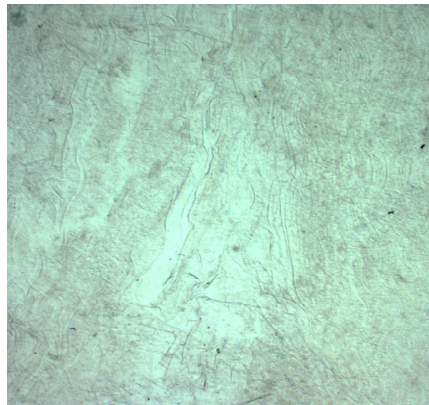

Tie2-LacZ

C

No-injury

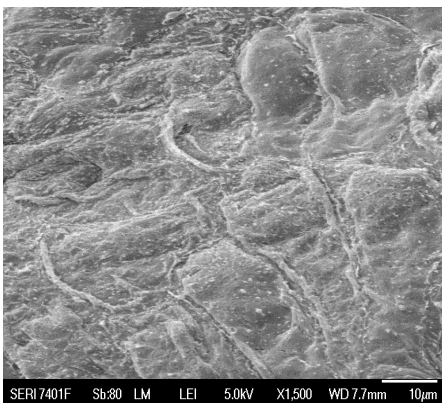

Injury

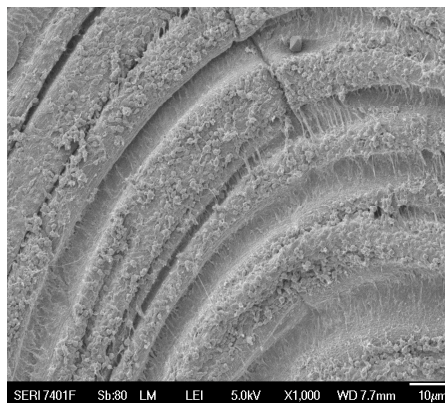

SEM

**Supplemental Figure I.** WT mice were subjected to carotid artery endothelial wire injury using a 0.014<sup>''</sup>-PTCA guidewire as previously described.<sup>11</sup> Carotid artery endothelial denudation was achieved two days after injury as shown by three independent strategies including: (A) silver nitrate perfusion staining; (B) staining for  $\beta$ -gal in Tie2-LacZ mice; and (C) scanning electron microscopy (SEM). *En face* carotid artery preparations demonstrated highly efficient endothelial denudation of the carotid artery (A, right, 20X magnification; B, right, 20X magnification; C, right, 1500X magnification).

## Supplemental Figure II

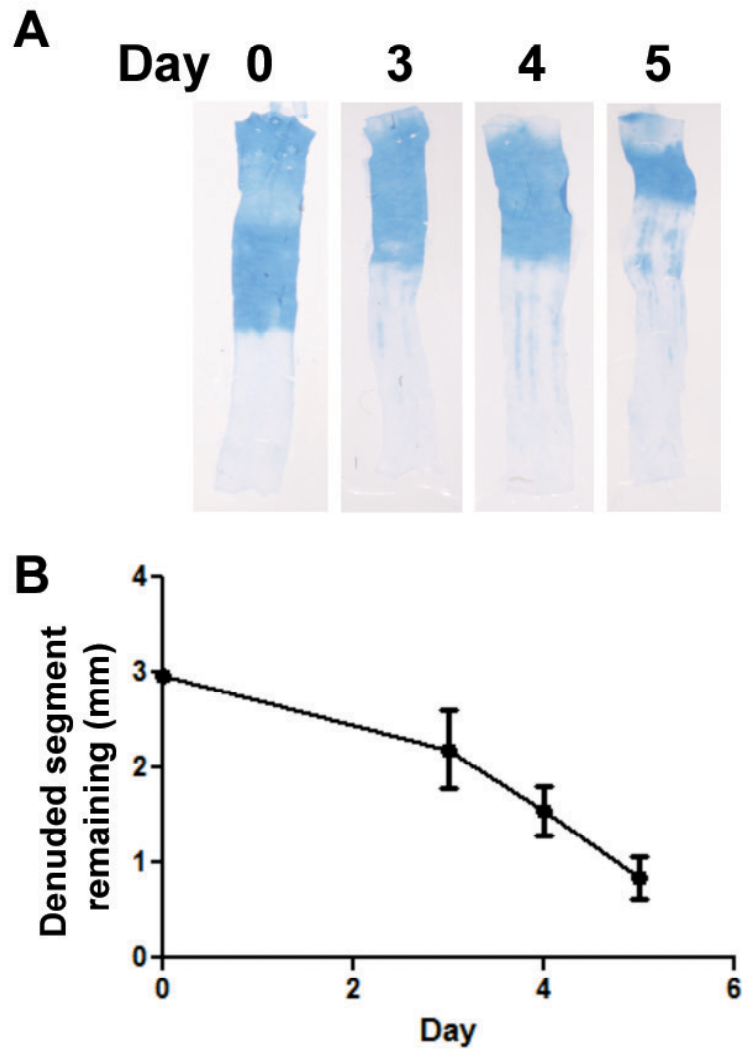

**Supplemental Figure II.** C57BL/6 WT mice were subjected to carotid artery endothelial wire thermal injury as described in the ‘Methods’ Section. The length of denuded segment remaining was determined after Evans blue systemic perfusion (n=5 mice/time point).

### Supplemental Figure III

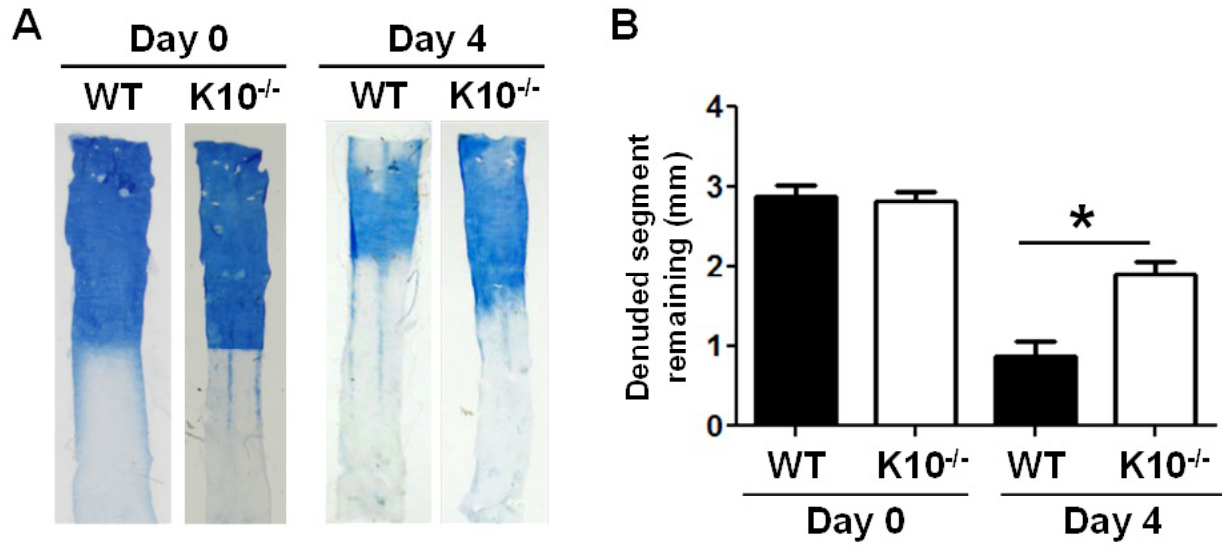

**Supplemental Figure III.** WT or KLF10<sup>-/-</sup> mice were subjected to carotid artery endothelial wire thermal injury as described in the ‘Methods’ Section. The length of denuded segment remaining was determined after Evans blue systemic perfusion (n=6-12/group). \*  $P=0.00072$ .

## Supplemental Figure IV

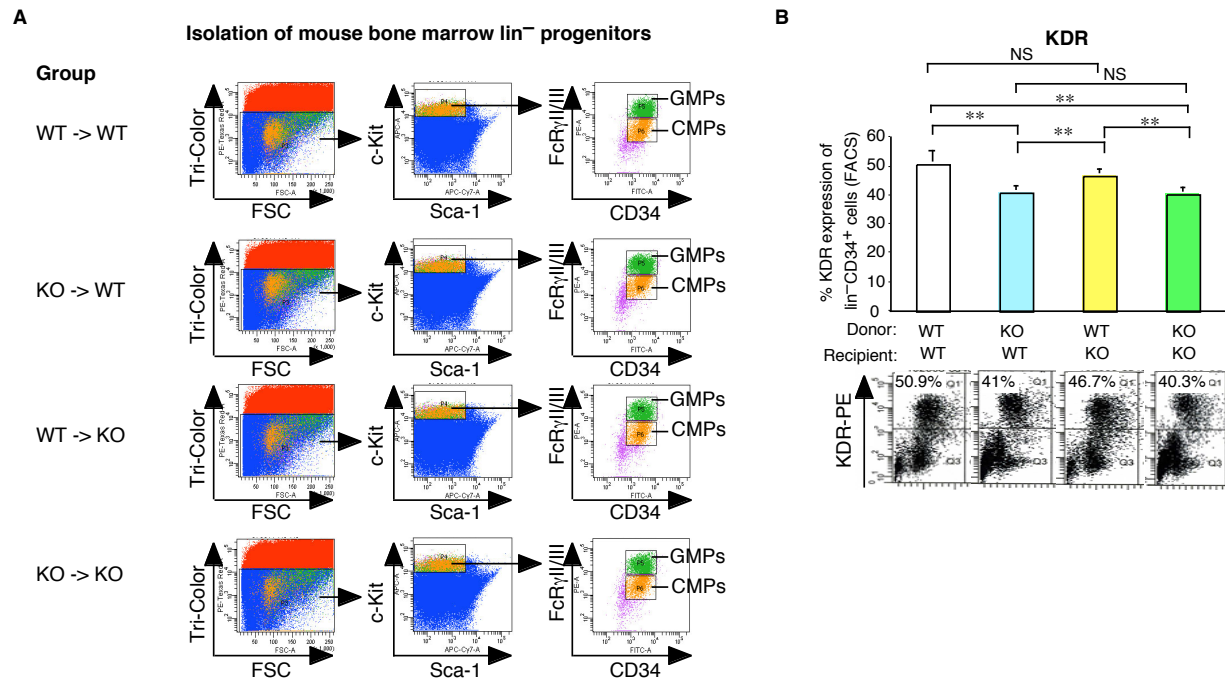

**Supplemental Figure IV.** Isolation of  $\text{lin}^- \text{BM}$  progenitor cells from WT or  $\text{KLF10}^{-/-}$  mice reconstituted with either WT or  $\text{KLF10}^{-/-}$  bone marrow (BM). Mouse bone marrow-derived cells were prospectively isolated and purified using multi-color FACS (BD FACSARIA, BD Biosciences) for CMPs ( $\text{Lin}^- \text{Sca1}^- \text{c-kit}^+ \text{CD34}^+ \text{Fc}\gamma\text{RII/III}^0$ ) and GMPs ( $\text{Lin}^- \text{Sca1}^- \text{c-kit}^+ \text{CD34}^+ \text{Fc}\gamma\text{RII/III}^{\text{hi}}$ ). Subsequently, cells were incubated in EGM-2 medium (Lonza) for 7 days, and subjected to flow cytometry to detect expression of KDR (eBioscience) (B) or CXCR4 and CCR7 (Fig. 2C). \*\*  $P < 0.01$ .



## Supplemental Figure V

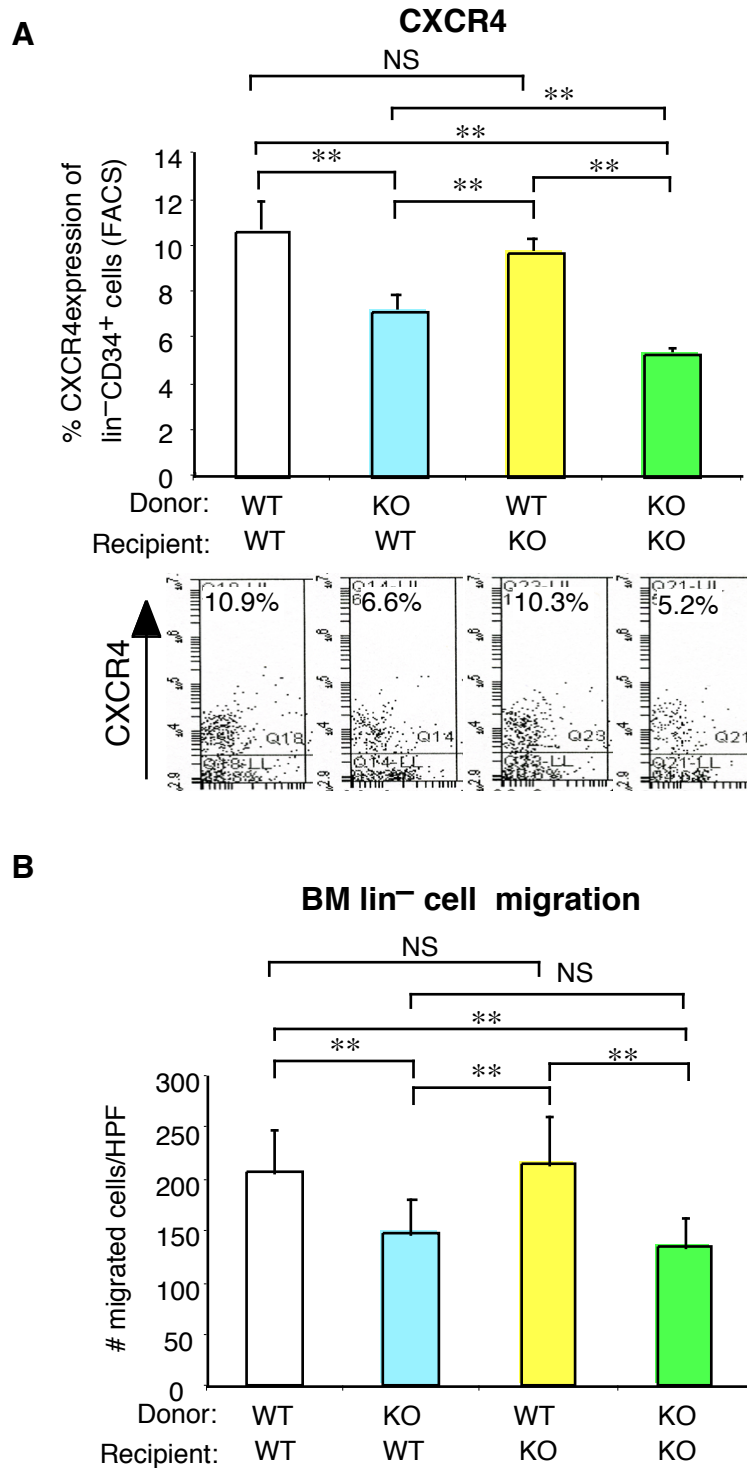

**Supplemental Figure V.** Expression of CXCR4 in  $\text{lin}^-$  BM progenitor cells freshly isolated from WT or  $\text{KLF10}^{-/-}$  mice reconstituted with either WT or  $\text{KLF10}^{-/-}$  bone marrow (BM). Mouse BM  $\text{lin}^- \text{CD34}^+$  progenitors were freshly isolated and subjected to flow cytometry to assess expression of CXCR4 (A) and migration in response to SDF-1 $\alpha$  by transwell Boyden chamber assays. \*\*  $P < 0.01$ ; NS, non-significant.
